# Supplementary material for: Vitrification of particulated articular cartilage via calculated protocols
Source: PubMed Central journal article supplement (PMC7979917; doi:10.1038/s41536-021-00123-5), 2021-03-19
Supplement: 41536_2021_123_MOESM1_ESM.pdf [file 41536_2021_123_MOESM1_ESM.pdf]

## Supplementary Materials

**Supplementary Table 1:** Absolute chondrocyte viability of porcine particulated articular cartilage after vitrification and assessment with a cell membrane integrity stain

| Chondrocyte viability (%) | Mean | Standard  | 95% Confidence |
|---------------------------|------|-----------|----------------|
|                           |      | Deviation | Interval       |
| Positive control          | 94.2 | 4.8       | [92.0, 96.4]   |
| Negative control          | 0.1  | 0.1       | [0, 0.1]       |
| Protocol E–D–P: Day 0     | 84.7 | 11.0      | [79.7, 89.7]   |
| Protocol E–D–P: Day 180   | 86.5 | 9.4       | [82.2, 90.8]   |
| Protocol E–D: Day 0       | 85.4 | 11.6      | [80.1, 90.7]   |
| Protocol E–D: Day 180     | 90.2 | 5.1       | [87.9, 92.6]   |

**Supplementary Table 2:** Absolute chondrocyte viability of human particulated articular cartilage after vitrification and assessment with a cell membrane integrity stain

| Chondrocyte viability (%) | Mean | Standard  | 95% Confidence |
|---------------------------|------|-----------|----------------|
|                           |      | Deviation | Interval       |
| Positive control          | 91.6 | 4.0       | [88.6, 94.6]   |
| Negative control          | 0.2  | 0.4       | [–0.1, 0.6]    |
| Protocol E–D–P: Day 0     | 79.1 | 10.4      | [71.1, 87.1]   |
| Protocol E–D–P: Day 180   | 82.5 | 11.4      | [70.5, 94.5]   |
| Protocol E–D: Day 0       | 74.7 | 17.2      | [61.4, 87.9]   |
| Protocol E–D: Day 180     | 76.3 | 12.1      | [63.6, 88.9]   |

**Supplementary Table 3:** Relative fluorescence units (mean  $\pm$  standard deviation) of porcine particulated articular cartilage after vitrification and assessment by alamarBlue

| Relative fluorescence units | 48 hr            | 96 hr            |
|-----------------------------|------------------|------------------|
| Positive control            | 68663 $\pm$ 1946 | 58913 $\pm$ 2497 |
| Negative control            | 10636 $\pm$ 976  | 15140 $\pm$ 1215 |
| Protocol E-D-P: Day 0       | 72026 $\pm$ 2283 | 68993 $\pm$ 3155 |
| Protocol E-D-P: Day 180     | 71636 $\pm$ 3084 | 67789 $\pm$ 5754 |
| Protocol E-D: Day 0         | 71763 $\pm$ 2815 | 71875 $\pm$ 4941 |
| Protocol E-D: Day 180       | 69620 $\pm$ 4030 | 66602 $\pm$ 6100 |

**Supplementary Table 4:** Relative fluorescence units (mean  $\pm$  standard deviation) of human particulated articular cartilage after vitrification and assessment by alamarBlue

| Relative fluorescence units | 48 hr            | 96 hr             |
|-----------------------------|------------------|-------------------|
| Positive control            | 63317 $\pm$ 7668 | 66137 $\pm$ 3752  |
| Negative control            | 5309 $\pm$ 2022  | 9275 $\pm$ 1743   |
| Protocol E-D-P: Day 0       | 56727 $\pm$ 5245 | 72280 $\pm$ 11261 |
| Protocol E-D-P: Day 180     | 54577 $\pm$ 221  | 68845 $\pm$ 4047  |
| Protocol E-D: Day 0         | 53159 $\pm$ 9816 | 69682 $\pm$ 5471  |
| Protocol E-D: Day 180       | 44304 $\pm$ 9151 | 65784 $\pm$ 7895  |
